# Supplementary material for: Valorization of Tomato Processing by-Products: Fatty Acid Extraction and Production of Bio-Based Materials
Source: MDPI journal article supplement (doi:10.3390/ma11112211), 2018-11-07
Supplement: s1 [file s1]

Supplementary information

# Valorization of Tomato Processing by-Products: Fatty Acid Extraction and Production of Bio-Based Materials

José J. Benítez, Paula M. Castillo, José C. del Río, Manuel León-Camacho, Eva Domínguez, Antonio Heredia, Susana Guzmán-Puyol, Athanassia Athanassiou and José A. Heredia-Guerrero

**Table S1.** Infrared bands of tomato pomace and its fractions.

| Assignment <sup>a</sup>               | Tomato Pomace <sup>b</sup> | Skins <sup>b</sup>             | Seeds <sup>b</sup>                 | Fiber <sup>b</sup>                                   | Main Contributor                                                 |
|---------------------------------------|----------------------------|--------------------------------|------------------------------------|------------------------------------------------------|------------------------------------------------------------------|
| $\nu(\text{O-H})/\nu(\text{N-H})$     | 3376                       | 3406 (s, br)<br>O-H H-bonded   | 3369 (s, br)<br>N-H + O-H H-bonded | 3400 (s, br)<br>O-H H-bonded                         | Polysaccharides<br>Adsorbed water<br>Proteins<br>Lignin<br>Cutin |
| $\nu(\text{N-H})$                     | 3299 (m, sh)               | -                              | 3300 (s, br)<br>N-H H-bonded       | -                                                    | Proteins                                                         |
| $\nu(-\text{CH}=\text{CH}-)$          | 3009 (w)                   | -                              | 3009 (w)                           | -                                                    | Unsaturated fatty acids                                          |
| $\nu_{\text{a}}(\text{CH}_3)$         | 2952 (w, sh)               | -                              | 2952 (w, sh)                       | 2965 (w, sh)<br>Polysaccharides, rhamnose            | Fatty acids                                                      |
| $\nu_{\text{a}}(\text{CH}_2)$         | 2927 (vs)                  | 2927 (vs)                      | 2925 (vs)                          | 2925 (m)                                             | Fatty acids<br>Cutin                                             |
| $\nu_{\text{s}}(\text{CH}_3)$         | 2871 (vw, sh)              | -                              | 2871 (vw, sh)                      | -                                                    | Fatty acids                                                      |
| $\nu_{\text{s}}(\text{CH}_2)$         | 2855 (s)                   | 2854 (s)                       | 2855 (s)                           | 2857 (w)                                             | Fatty acids<br>Cutin                                             |
| $\nu(\text{C=O})$ ester               | 1743 (s)                   | -                              | 1746 (s)                           | -                                                    | Esterified fatty acids                                           |
| $\nu(\text{C=O})$ ester               | 1730 (vw, sh)              | 1733 (s)<br>Cutin              | -                                  | 1737 (s)<br>bonded ferulic, <i>p</i> -coumaric units | Cutin                                                            |
| $\nu(\text{C=O})$ ester               | 1714 (w)                   | 1715 (w, sh)<br>ester H-bonded | -                                  | -                                                    | Esterified fatty acids                                           |
| Amide I                               | 1654 (s)                   | 1656 (vw, sh)                  | 1655 (s)                           | -                                                    | Proteins                                                         |
| $\nu(\text{C=C})$                     | -                          | 1628 (s)                       | -                                  | -                                                    | Phenolics                                                        |
| $\nu(\text{C=C}) + \delta(\text{OH})$ | 1630 (w, sh)               | -                              | 1630 (w, sh)                       | -                                                    | Fatty acids<br>Adsorbed water                                    |
| $\delta(\text{OH})$                   | -                          | -                              | -                                  | 1641 (s, br)                                         | Adsorbed water                                                   |
| $\nu(\text{C-C})$                     | -                          | 1608 (w, sh)                   | -                                  | -                                                    | Phenolics                                                        |
| $\nu(\text{C=C-C})$                   | -                          | 1586 (w, sh)                   | -                                  | -                                                    | Phenolics                                                        |
| Aromatic skeletal                     | -                          | -                              | -                                  | 1597 (w, sh)                                         | Phenolics<br>Lignin                                              |

|                                                                                          |               |                        |                                                  |                                              |                                         |
|------------------------------------------------------------------------------------------|---------------|------------------------|--------------------------------------------------|----------------------------------------------|-----------------------------------------|
| vibration +<br>$\nu(\text{C}=\text{O})$                                                  |               |                        |                                                  |                                              |                                         |
| Amide II                                                                                 | 1542 (m)      | -                      | 1541 (m)                                         | -                                            | Proteins                                |
| $\nu(\text{C}=\text{C}-\text{C})$                                                        |               | 1550 (w)               | -                                                | -                                            | Phenolics                               |
| $\nu(\text{C}=\text{C}-\text{C})$                                                        | 1518 (w)      | 1516 (m)<br>Aromatics  | 1516 (w, sh)<br>aromatic ring, G<br>units lignin | 1509 (m)<br>aromatic ring, G<br>units lignin | Phenolics<br>Lignin                     |
| $\delta(\text{CH}_2) +$<br>$\delta(\text{COH})$                                          | 1456 (w)      | 1457 (w, sh)<br>cutin  | 1457 (m)<br>polysaccharides,<br>fatty acids      | 1457 (m)<br>polysaccharides                  | Cutin<br>Polysaccharides<br>Fatty acids |
| $\nu(\text{C}=\text{C}-\text{C})$                                                        | 1445 (w)      | 1441 (w)               | -                                                | -                                            | Phenolics                               |
| $\nu(\text{C}-\text{N})$                                                                 |               |                        | 1439 (vw, sh)                                    | -                                            | Proteins                                |
| aromatic<br>skeletal<br>vibration + $\nu(\text{C}-\text{N})$                             | 1415 (vw)     | 1416 (vw)<br>Phenolics | 1417 (w)<br>phenolics,<br>proteins               | -                                            | Phenolics<br>Proteins                   |
| aromatic<br>skeletal<br>vibration +<br>$\delta(\text{CH})$                               | -             | -                      | -                                                | 1424 (m)                                     | Lignin                                  |
| $\nu(\text{C}-\text{N})$                                                                 | 1400 (vw)     | -                      | 1400 (w)                                         | -                                            | Proteins                                |
| $\delta(\text{CH}) + \delta_s(\text{CH}_3)$                                              | 1377 (m)      | 1373 (w)               | 1379 (w)                                         | 1377 (m)                                     | Fatty acids<br>Lignin                   |
| $\delta(\text{OH})$                                                                      | 1332 (vw)     | 1337 (vw)              | -                                                | 1335 (w)                                     | Phenolics<br>Lignin                     |
| $\delta(\text{CH}_2)$ wagging                                                            | 1317 (w)      | 1321 (vw)              | 1317 (w)                                         | 1322 (w)                                     | Cutin<br>Fatty acids                    |
| $\delta(\text{OH})$                                                                      | 1262 (w, sh.) | -                      | -                                                | 1268 (w, sh)                                 | Polysaccharides                         |
| Amide III<br>+ $\delta(\text{OH})$                                                       |               | -                      | 1237 (m)                                         | -                                            | Proteins<br>Lignin                      |
| $\delta(\text{COH}) + \nu(\text{C}-\text{O}) + \nu(\text{C}-\text{C})$                   | 1239 (s)      | 1244 (s, br.)          | -                                                | -                                            | Phenolics<br>Cutin                      |
| $\delta(\text{OH})$                                                                      |               | -                      | -                                                | 1247 (m)                                     | Lignin                                  |
| $\nu_a(\text{C}-\text{O}-\text{C})$                                                      | 1159 (s)      | 1165 (s)               | 1161 (m)                                         | 1161 (m)                                     | Cutin<br>Polysaccharides                |
| $\nu_s(\text{C}-\text{O}-\text{C})$ ester<br>+ asymmetric in-<br>phase ring<br>vibration | 1101 (m)      | 1103 (m)               | 1116 (w)                                         | 1117 (w, sh)                                 | Cutin<br>Polysaccharides                |
| asymmetric ring<br>vibration                                                             | -             | -                      | 1092 (w)                                         | 1104 (w)                                     | Polysaccharides                         |
| $\nu(\text{C}-\text{OH})$<br>secondary                                                   | -             | -                      | 1073 (w)                                         | 1079 (w)                                     | Polysaccharides                         |
| $\nu(\text{C}-\text{O}) + \nu(\text{C}-\text{C})$                                        | 1065 (s)      | 1064 (vs)              | 1055 (s, br)                                     | 1052 (vs)                                    | Polysaccharides<br>(hemicellulose)      |
| $\nu(\text{C}-\text{O}) + \nu(\text{C}-\text{C})$                                        | 1035 (m)      | 1029 (s)               | -                                                | -                                            | Polysaccharides<br>(pectin)             |
| $\delta(\text{CH})$ out-of-<br>plane + C-O<br>valence<br>vibration                       | 969 (vw, sh)  | -                      | 997 (w, sh)                                      | 989 (w, sh)                                  | Polysaccharides<br>(cellulose)          |
| $\delta(\text{CH})$ out-of-<br>plane                                                     | 917 (vw, sh)  | 922 (vw)               | -                                                | -                                            | Phenolics                               |

|                                                                  |              |                        |         |          |                                |
|------------------------------------------------------------------|--------------|------------------------|---------|----------|--------------------------------|
| $\delta(\text{C-H}) +$<br>anomere COC,<br>CCO, CCH<br>vibrations | 899 (vw, sh) | 896 (w)                | -       | 896 (w)  | Polysaccharides<br>(cellulose) |
| $\delta(\text{CH})$ out-of-<br>plane ( $\gamma$ band)            | 832 (w)      | 833 (m)                | -       | -        | Phenolics                      |
| $\nu(\text{C-N})$                                                | 817 (vw)     | -                      | 812 (w) | -        | Proteins                       |
| $\delta(\text{CH}_2)$ rocking                                    | 722 (vw)     | 722 (w)                | 722 (w) | 722 (vw) | Cutin<br>Fatty acids           |
| $\delta(\text{C-OH})$ out-of-<br>plane                           | 669 (vw)     | 668 (vw),<br>cellulose | -       | 669 (w)  | Polysaccharides<br>(cellulose) |

<sup>a</sup>  $\nu$ , stretching;  $\delta$ , bending; a, asymmetric; s, symmetric.

<sup>b</sup> s, strong; m, medium; w, weak; vs, very strong; vw, very weak; br, broad; sh, shoulder.

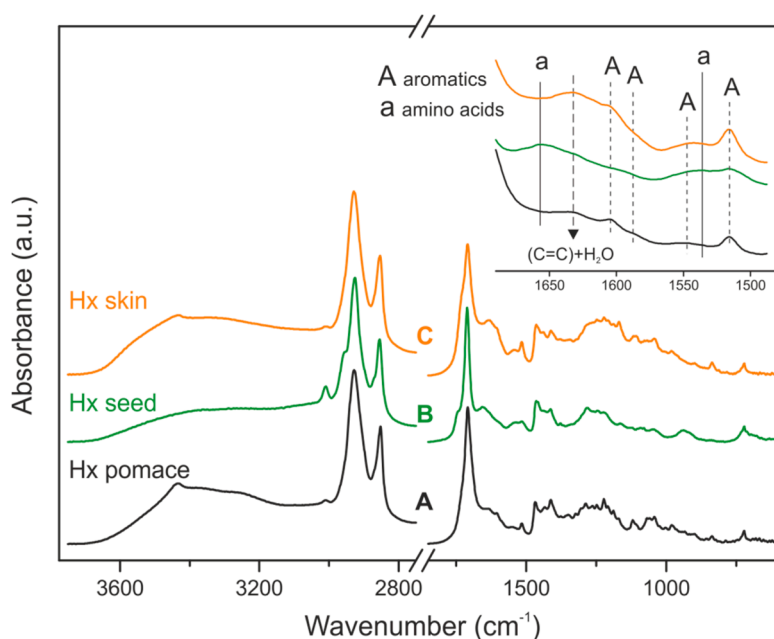

**Figure S1.** IR transmission spectra of Hx fractions obtained by alkaline hydrolysis from (A) tomato pomace and isolated (B) seeds and (C) skins. The 1690–1485  $\text{cm}^{-1}$  region is expanded in the inset.

The calculated  $\text{Hx}^{\text{max}}$  value was higher than the theoretical amount of fatty acids that can be extracted from the skins of the pomace (20%), Table 1. Consequently, other components should be considered to account for the rest (10–12%). Fatty acids from seeds could represent up to a 15% supplement and would justify by themselves such a difference. Actually, the  $\nu(-\text{CH}=\text{CH}-)$  peak at 3010  $\text{cm}^{-1}$  in the IR spectrum of the Hx pomace is a fingerprint of such contribution, Figure S1A. To quantify the contribution of seeds to Hx pomace, isolated seeds were processed in the same conditions as the pomace, resulting in a dry precipitate after acidification (Hx seed) of about 18% of the initial weight. Considering the abundance of seeds in the pomace (55%), their contribution to the Hx pomace is estimated in about 10%, which accounts for the supplementary recovery. The IR spectrum of Hx seed, Figure S1B, suggests the predominance of aliphatic acids (intense bands of  $-\text{COOH}$  (1710  $\text{cm}^{-1}$ ) and  $-\text{CH}_2-$  (2853 and 2926  $\text{cm}^{-1}$ ). However, proteins can also be recovered from tomato seeds by alkaline treatment and acidification. In fact, amide I and II bands can be detected in the IR spectrum of Hx seed fraction (upper inset in Figure S1), but their intensity is much more reduced in Hx pomace. The amino acid content in Hx pomace was experimentally determined, according to reported HPLC protocols (Megías, Cortés-Giraldo, Girón-Calle, Vioque, & Alaiz, 2015) to be less than 0.1% (mainly glycine). Hence, Hx pomace is mostly constituted of unsaturated and hydroxyl fatty acids.

Megías, C.; Cortés-Giraldo, I.; Girón-Calle, J.; Vioque, J.; Alaiz, M. Determination of l-canavanine and other free amino acids in *Vicia disperma* (Fabaceae) seeds by precolumn derivatization using diethyl ethoxymethylenemalonate and reversed-phase high-performance liquid chromatography. *Talanta* **2015**, *131*, 95–98.
